# Supplementary material
Source: PubMed Central journal article supplement (PMC4610875)
Supplement: NIHMS721531-supplement-2.pdf [file NIHMS721531-supplement-2.pdf]

## Differential requirements of TCR signaling in homeostatic maintenance and function of Dendritic Epidermal T Cells

### Supplemental Data

#### Supplemental Movie.1 Intravital scan of wild type DETCs at steady state.

$TCR\delta^{CreER}R26^{ZsGreen}$  mice (n = 2) were treated with tamoxifen. One week later, images of ZsGreen labeled DETCs (ear) were recorded for 3 hours by two-photon microscopy.

#### Supplemental Movie.2 Intravital scan of LAT-deficient DETCs at steady state.

$TCR\delta^{CreER}Lat^{GFP/GFP}R26^{ZsGreen}$  mice (n = 2) were treated with tamoxifen. One week later, images of ZsGreen labeled DETCs (ear) were recorded for 3 hours by two-photon microscopy.

#### Supplemental Movie.3 Morphological change of wild type DETCs upon wounding.

$TCR\delta^{CreER}R26^{ZsGreen}$  mice (n = 2 each) were treated with tamoxifen. One week later, ear cut was performed and the dynamics of DETCs was recorded at the wound edge (top) for 10 hours by two-photon microscopy.

#### Supplemental Movie.4 Morphological change of LAT-deficient DETCs upon wounding.

$TCR\delta^{CreER}Lat^{GFP/GFP}R26^{ZsGreen}$  mice (n = 2 each) were treated with tamoxifen. One week later, ear cut was performed and the dynamics of DETCs was recorded at the wound edge (top) for 10 hours by two-photon microscopy.
